# Supplementary material
Source: publisher figshare collection journal article supplement (https://gsapubs.figshare.com/ndownloader/files/22756712)
Supplement: Supplementary file 1 [file 22756712]

TABLE S1. BASIC DATA FOR LOCALITIES AND WOOD SAMPLES OF DAWSON CUT FOREST BED (DCFB) NEAR FAIRBANKS, ALASKA

| Sample No. | Location                                          | Date               | Specimen            | Description                                                                                                                      | No. of Tree Rings | Age        | Identified                                                   | Discussion and Stratigraphy                                                                                                                                                         | Comments                                                                                 |
|------------|---------------------------------------------------|--------------------|---------------------|----------------------------------------------------------------------------------------------------------------------------------|-------------------|------------|--------------------------------------------------------------|-------------------------------------------------------------------------------------------------------------------------------------------------------------------------------------|------------------------------------------------------------------------------------------|
| None       | Engineer Creek                                    | 1937               | Logs and stumps     | Stratum of peat with cracked logs and stumps, little rot; locally impregnated with “sulfur” and rotted. Evidence of forest fire. |                   |            | Spruce<br>J.L. Giddings                                      | Bed of logs and stumps lying on top Fox Gravel at base of 30-m thick silt section.                                                                                                  | Data from J.L. Giddings (1938, p.3) and oral commun. 11/4/50).                           |
| None       | Eva Creek                                         | 6/28/49            | Log and spruce cone | 10-cm diam. spruce log; spruce cone 3-cm long on tree layer with peat.                                                           |                   |            | Spruce, TLP<br>White spruce cone.<br>W.S. Beninghoff<br>USGS | Black silt termed lower muck & under green Gold Hill Loess                                                                                                                          | Clear-ice seams, lenses & masses of various shapes in forest bed.                        |
| None       | Engineer Creek; north wall adjacent to Dawson Cut | 8/9/49             |                     | Burnt vegetation including peat.                                                                                                 |                   | About 2 Ma |                                                              | Base of Gold Hill Loess with gravel layer associated with EC tephra 5-cm thick. Stratigraphically close to PA tephra (2.02 Ma). EC tephra is enclosed in burnt peat layers of DCFB. | EC tephra (UA 351) type locality.                                                        |
| None       | Cripple Sump                                      | 8/19/49<br>8/29/49 | None                | Black Silt                                                                                                                       |                   | About 2 Ma | TLP                                                          | Black silt on Fox Gravel 2 m below Mining Camp tephra exposed on east side of cut 1 m above Fox Gravel.                                                                             | Mining Camp tephra (UA352). PA tephra (UA335) (2.02 Ma). PA tephra first collected here. |
| None       | Eva Creek East wall, lower end                    | 9/8/49             | Spruce stumps       | Spruce stumps up to 25 cm diam. in place. Rooted in black silt & gravel.                                                         |                   |            | Spruce, TLP                                                  | 17 m below surface in Dawson Cut Forest Bed at base of Gold Hill Loess & overlying Fox Gravel. Logs also occur in top of gravel                                                     |                                                                                          |

|      |                                                            |         |                                         |                                                                                                                                                                                                                                                                                               |                                                                                                                                               |                                |                                                                                                                                                                                              |                                                                                                                                                                                                                                                                 |
|------|------------------------------------------------------------|---------|-----------------------------------------|-----------------------------------------------------------------------------------------------------------------------------------------------------------------------------------------------------------------------------------------------------------------------------------------------|-----------------------------------------------------------------------------------------------------------------------------------------------|--------------------------------|----------------------------------------------------------------------------------------------------------------------------------------------------------------------------------------------|-----------------------------------------------------------------------------------------------------------------------------------------------------------------------------------------------------------------------------------------------------------------|
| None | Eva Creek<br>East wall,<br>lower end                       | 9/13/49 | Spruce stumps                           | Spruce stumps up to<br>25 cm diam. in place.<br>Rooted in black silt<br>& gravel.                                                                                                                                                                                                             |                                                                                                                                               | White spruce<br>W. Drury USGS  | 17 m below<br>surface in thin<br>Dawson Cut Forest<br>Bed at base of Gold<br>Hill Loess overlying<br>Fox Gravel                                                                              | Drury, botanist, in<br>field with Péwé                                                                                                                                                                                                                          |
| 15   | Engineer Creek;<br>north wall<br>adjacent to<br>Dawson Cut | 9/17/49 | Spruce stumps                           | “Healthy” spruce<br>stumps in place and<br>wood “pieces”.                                                                                                                                                                                                                                     | About<br>2 Ma                                                                                                                                 | White spruce<br>W. Drury USGS  | Stumps and logs<br>underneath green<br>Gold Hill Loess<br>rooted & lying on<br>angular Fox Gravel.<br>Slightly above<br>forest lies type<br>specimen of Mining<br>Camp tephra 5 cm<br>thick. | Mining Camp tephra<br>(UA360); occurs<br>stratigraphically very<br>close to PA tephra<br>(UA355) (2.02 Ma)<br>at Cripple Sump, and<br>to EC tephra at<br>Dawson Cut.                                                                                            |
| 16   | Eva Creek<br>east wall<br>Lower end                        | 9/18/49 | In situ stumps<br>and prostrate<br>logs | Several large (up to<br>22 cm diam.) upright<br>white spruce rooted<br>stumps with some<br>bark. Burnt wood<br>debris. Adjacent to<br>stumps were<br>horizontal logs 12cm<br>diam; wood is “soft”<br>smashed, & flattened.<br>Interleaved angular<br>gravel penetrates<br>wood. Moss present. | Radio-<br>carbon-<br>date:<br>U of<br>Mich.-<br>18,000<br>yrs. U<br>of<br>Chicago<br>>20,000<br>yrs.<br>Lamont<br>(L 137X)<br>>28,000<br>yrs. | White spruce-<br>W. Drury USGS | Stumps and logs<br>underneath green<br>Gold Hill Loess<br>rooted & lying on<br>angular Fox Gravel<br>tightly cemented by<br>iron oxide. Dawson<br>Cut Forest Bed<br>approx. 1 m thick.       | A thin coating of<br>iron oxide stain and<br>mica flakes cover<br>the large stump.<br>Near tree stump is<br>type specimen of<br>Weigh Scale tephra<br>(UA361). Sample<br>16 no longer<br>available. See Fig.<br>6, Péwé, 1975b.<br>See Fig. 41, Péwé,<br>1975a. |
| None | Engineer Creek;<br>adjacent to<br>Dawson Cut               | 6/9/51  |                                         | Several prostrate logs<br>35 cm dia & 2 ½ m<br>long. Evidence of<br>forest fire                                                                                                                                                                                                               |                                                                                                                                               | Spruce<br>TLP                  | Forest bed on Fox<br>Gravel. Lies at<br>base of 46 m thick<br>section of loess                                                                                                               |                                                                                                                                                                                                                                                                 |
| 69   | Sheep Creek<br>west wall                                   | 7/6/55  | log                                     | Prostrate log                                                                                                                                                                                                                                                                                 | 45-47                                                                                                                                         | Spruce<br>TLP                  | In iron-stained and<br>cemented sub-<br>angular clasts; Fox<br>Gravel                                                                                                                        |                                                                                                                                                                                                                                                                 |

|      |                                                        |         |                      |                                                                      |       |                                      |                                                                                                                                 |                                                                      |
|------|--------------------------------------------------------|---------|----------------------|----------------------------------------------------------------------|-------|--------------------------------------|---------------------------------------------------------------------------------------------------------------------------------|----------------------------------------------------------------------|
| 97A  | Sheep Creek                                            | 9/20/55 | Flattened wood       | Prostrate, iron-stained, flattened burnt wood, root.                 | 32    | Spruce- R.C. Koeppen, USDA (9/28/67) | Iron-stained flattened wood at top of Fox Gravel tightly cemented by iron oxide.                                                |                                                                      |
| 97B  | Sheep Creek                                            | 9/20/55 | Stem                 | 5 cm dim. stem burned. Extremely narrow rings                        | 200+  | Black spruce TLP; PMB                | Wood at top of Fox Gravel                                                                                                       |                                                                      |
| 101  | Sheep Creek East-facing wall center of linear cut      | 6/13/56 | Wood & organic silt. | Wood and organic silt at underlying gravel contact.                  | 60-70 | Spruce. R.C.Koeppen, USDA (9/28/67)  | Flattened wood near top of Fox Gravel                                                                                           | Dawson Cut Forest Bed has clear ice seams. No foliated ice.          |
| 102  | Sheep Creek East-facing wall center of linear cut      | 6/13/56 | Spruce fragments     | Vertical, burnt spruce fragments. Burnt clump (3 cm diam.) of peat.  | 27-29 | Spruce TLP                           | Fragments in possible ice wedge cast.                                                                                           |                                                                      |
| 103  | Sheep Creek west wall                                  | 8/9/56  | Spruce logs spruce   | Iron-stained logs 10 cm diam in gravel.                              | 22    | Spruce TLP                           | Smashed forest on Fox Gravel. Joints in black silt & overlying green Gold Hill Loess are heavily cemented with iron oxide.      | Mining exposure cliff of frozen sediments 35m high.                  |
| None | Sheep Creek Bend in dredge section                     | 8/14/56 | Spruce logs          | Horizontal wood & logs 10 cm diam. of spruce; cracked, iron-stained. |       | Spruce TLP                           | At base of green Gold Hill Loess is a 1 m thick forest bed with cobbles; knocked flat in torrential deposit, overturned stumps. |                                                                      |
| None | Sheep Creek NW wall above bend in dredge section.      | 8/14/56 | Logs                 | Prostrate Logs                                                       |       |                                      | Black, 1-to2-m thick silty forest bed of horizontal logs overlying iron-stained cemented Fox Gravel.                            |                                                                      |
| None | Sheep Creek east wall; downstream from bend in section | 8/14/56 | Horizontal logs.     | Prostrate spruce logs up to 2 ½ m long                               |       | Spruce forest TLP                    | Forest bed up to 1 m thick; black organic silt crops out at base along a 500 m-long                                             | Joints in the silty forest bed & overlying green Gold Hill Loess are |

|      |                       |         |                               |                                                                                                                                                                                                                                                        |    |                                                     |                                                                                                                                                                                                                                                          |                                                                                                                 |
|------|-----------------------|---------|-------------------------------|--------------------------------------------------------------------------------------------------------------------------------------------------------------------------------------------------------------------------------------------------------|----|-----------------------------------------------------|----------------------------------------------------------------------------------------------------------------------------------------------------------------------------------------------------------------------------------------------------------|-----------------------------------------------------------------------------------------------------------------|
|      |                       |         |                               |                                                                                                                                                                                                                                                        |    |                                                     | mining cut under Gold Hill Loess & on top of & in upper meter of underlying iron-cemented Fox Gravel. Lens 1 m thick of organic rich silt in gravel.                                                                                                     | heavily iron-stained.                                                                                           |
| None | Sheep Creek lower end | 5/31/57 | Spruce logs & cones           | Badly weathered prostrate logs 10 to 35 cm diam. in tightly cemented iron-stained gravel.                                                                                                                                                              |    | Spruce TLP                                          | Black silty layer with forest bed of spruce logs at & on top of Fox Gravel underlying Gold Hill Loess                                                                                                                                                    |                                                                                                                 |
| None | Sheep Creek lower end | 7/2/57  | Horizontal logs               | White spruce & birch up to 25 cm-diam. Also, black spruce & cottonwood (Populus). Some specimens twisted & gnarled similar to tree line specimens. Some slightly to badly charred by fire. Wood shows evidence of bark beetles (Scolytidae) (Dr. Lutz) |    | Black & white spruce, cottonwood birch. Lutz (Yale) | Wood of Dawson Cut Forest Bed incorporated into top of iron-stained strongly cemented Fox Gravel; iron-stained joints 2 mm thick in forest bed & Gold Hill Loess. Ball of mammoth femur & part of pelvis of bison associated with wood in top of gravel. | Lutz, botanist at Yale, in field with Péwé.                                                                     |
| 139  | Sheep Creek upper end | 6/2/60  | Peat & sticks (pollen sample) | Compressed sticks 5 to 15 cm diameter                                                                                                                                                                                                                  |    | Deciduous (?) AZLTRR                                | Wood and peat at top of iron-cemented Fox Gravel underlying 28 m of loess & reworked loess.                                                                                                                                                              | Exposed at top of bank of dredged pond.                                                                         |
| 180  | Eva Creek upper end   | 7/2/67  | Small sticks                  | Sticks 40 cm long and organic matter. Fragments of bark.                                                                                                                                                                                               | 11 | Spruce TLP                                          | Dawson Cut Forest Bed specimens in reddish cemented Fox Gravel under 30 m of overlying loess formations.                                                                                                                                                 | Complete section sampled for geochemical analysis of silts. See Fig. 6. Péwé, 1975b<br>See Fig. 29. Péwé, 1975a |

|      |                               |         |                        |                                                                                                                                                                                                                  |     |                                                                               |                                                                                                                                                                             |                                                                                                                 |
|------|-------------------------------|---------|------------------------|------------------------------------------------------------------------------------------------------------------------------------------------------------------------------------------------------------------|-----|-------------------------------------------------------------------------------|-----------------------------------------------------------------------------------------------------------------------------------------------------------------------------|-----------------------------------------------------------------------------------------------------------------|
| None | Eva Creek upper end           | 7/8/70  | Small logs & sticks    | Logs & sticks                                                                                                                                                                                                    |     | Spruce TLP                                                                    | Dawson Cut Forest Bed on Fox Gravel                                                                                                                                         | Complete section sampled for geochemical analysis of silts. See Fig. 6. Péwé, 1975b<br>See Fig. 29. Péwé, 1975a |
| 185A | Eva Creek upper end west wall | 6/27/87 | Flattened log          | Flattened spruce log 18 cm dia and ¾ m long (part remains in frozen iron-cemented gravel). Canary-yellow stained and "rotten".                                                                                   | 188 | Spruce. US Forest Products Lab Dept. of Agriculture 3/7/88 AZLTRR Spruce, TLP | Prostrate logs, stumps, & sticks pointing downstream in silt lenses at top of iron-cemented angular Fox Gravel. Under Gold Hill Loess.                                      |                                                                                                                 |
| 190  | Eva Creek upper end west wall | 6/15/88 | Somewhat flattened log | Log 1.3 m long & 20 cm diameter with no bark.                                                                                                                                                                    |     | Spruce TLP                                                                    | Prostrate log, in reddish iron-cemented top of Fox Gravel. Part of Dawson Cut Forest Bed. Part of skull & left horn of Bison priscus & other vertebrates from this horizon. | Bison identified by R.D. Guthrie (oral commun: June 1988)                                                       |
| 191  | Eva Creek upper end west wall | 6/13/89 | Spruce log             | Spruce log with bright yellow staining. Log 21 cm diam. at base of tree near roots. Large 25-50 cm root system. Log 1 1/2m long. Prostrate & broken over to point downstream. Adjacent log burned and with bark. | 152 | Spruce, TLP AZLTRR Tree 152 yrs. old†                                         | Prostrate log in 1/2m thick silt lenses 2 m below top of iron-cemented reddish FoxGravel. Log battered.                                                                     | Entire specimen donated to Univ. of Alaska Fairbanks Museum, June 1989                                          |

---

Footnotes      AZLTRR      University of Arizona Laboratory of Tree Ring Research, Tucson, AZ 85721  
                   †            Peter Brown determined number of tree rings  
                              UA351, etc. are laboratory numbers of J.A. Westgate  
                              All wood & tephra samples in this table collected by T.L. Péwé.





Level of PA tephra

Cripple Gravel

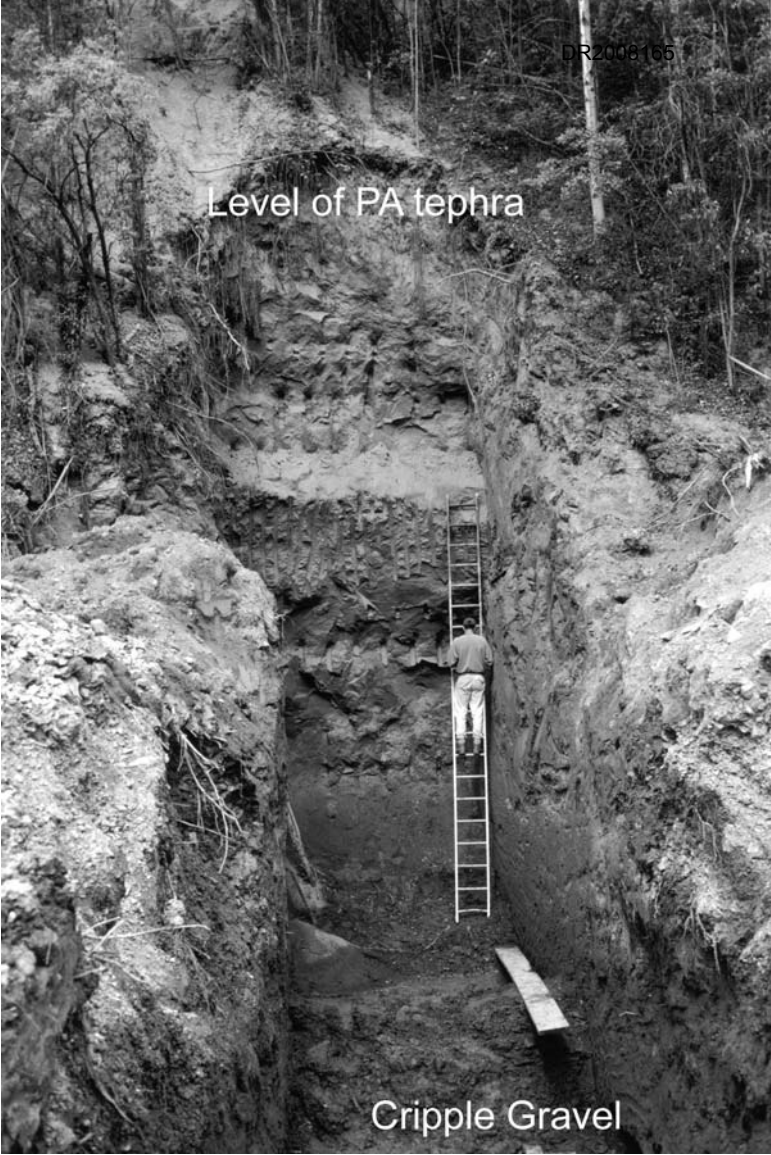



**A**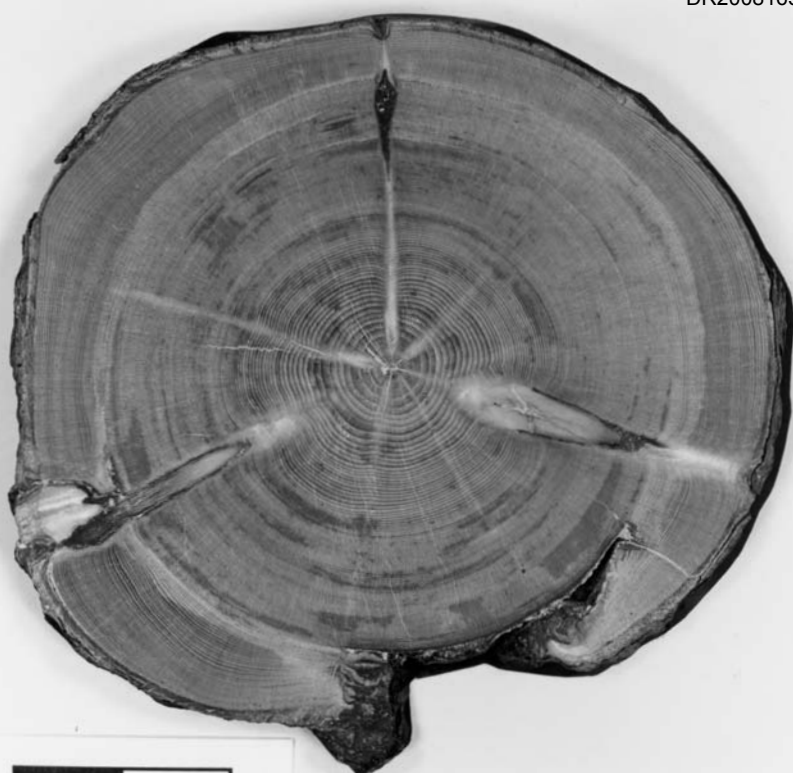

2 cm

**B**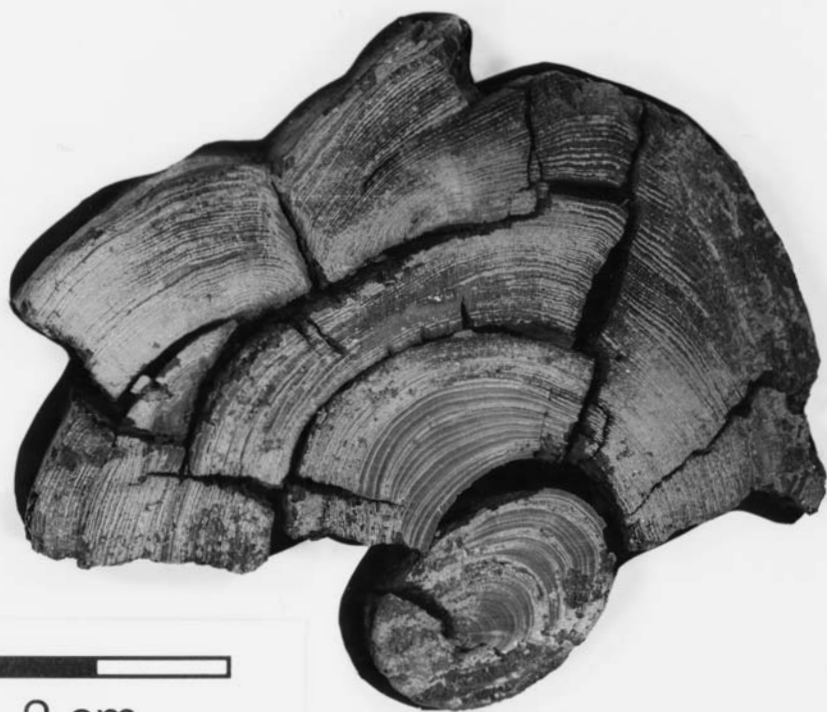

2 cm

DR2008165

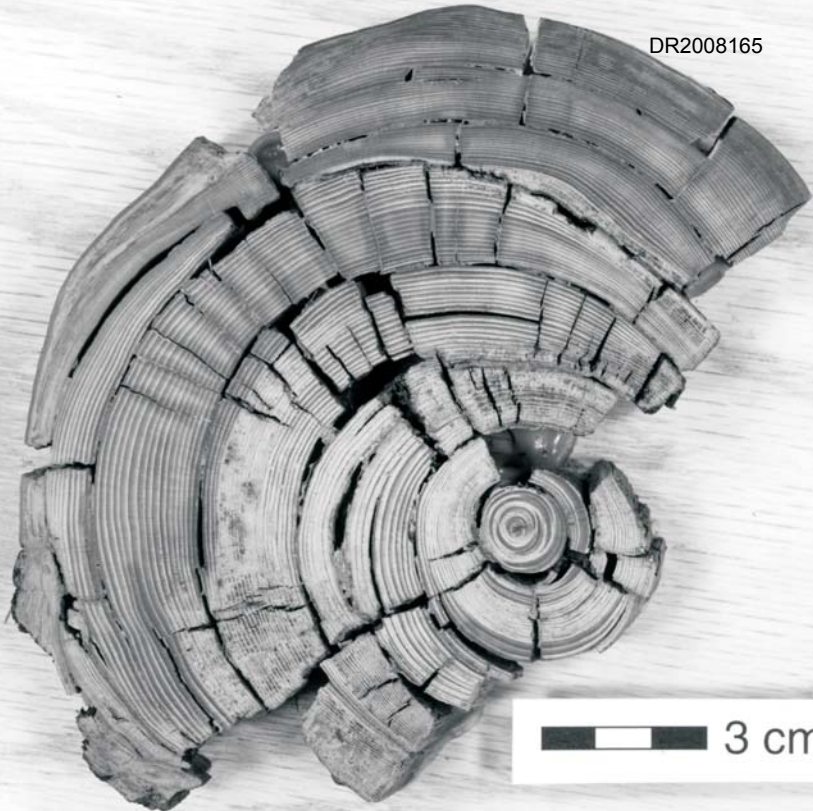

## SUPPLEMENTARY INFORMATION

### CAPTIONS TO FIGURES

Figure S1. Excavation exposing entire section of lower Gold Hill Loess at lower part of Trench 3, east end of Gold Hill Cut, 10 km west of Fairbanks, Alaska. Loess extends from level of PA tephra at top of lower Gold Hill Loess to Cripple Gravel at the base. See Figure 6 for stratigraphic details. Photograph PK 29310 by T. L. Péwé, June, 1989.

Figure S2. Stem disks of modern and fossil black spruce (*Picea mariana*) from central Alaska. (A) Modern black spruce 207 years old that grew at an elevation of 130 m on flood plain of Yukon River, Fort Yukon, Alaska, at the junction with the Porcupine River (Fig. 1). Section collected and cut by W. S. Benninghoff, U. S. Geological Survey, 1948. (B) Fossil black spruce 200+ years old that grew at an elevation of 230 m on the lower north-facing hill slope, 10 km northwest of Fairbanks, Alaska. Sample no. 97b (Table S1, Supplementary Information) collected by T. L. Péwé in 1955 in perennially frozen Dawson Cut Forest Bed exposed at the base of the east wall of Sheep Creek Cut. Wood specimens identified by D. Marguerie and Y. Bégin, University of Laval, Quebec, 1997. Photographs by D. H. Ball, Arizona State University, Tempe.

Figure S3. Stem disk of spruce cut from rooted stump preserved in permafrost in Dawson Cut Forest Bed. Section has 152 rings and tree grew on gravel at an elevation of 250 m in Eva Creek valley bottom, 14 km west of Fairbanks, Alaska. Sample no. 191 (Table S1, Supplementary Information). Photograph by D. H. Ball, Arizona State University, Tempe.
